# Supplementary material for: Methyl ketones: a comprehensive study of a novel biofuel
Source: Royal Society of Chemistry journal article supplement (doi:10.1039/d4se00035h), 2024-01-01
Supplement: d4se00035h1.xlsx [file d4se00035h1.xlsx]

## Sheet: Solvents
Name	Density at 20 °C to 25 °C [g cm-3]	Log P [-]	MP [°C]	Flash Point [°C]	CAS-No.	Formula	Molecular Weight [g mol-1]
n-decane	0.73	5	-29.7	46	124-18-5	C10H22	142.28
Farnesol	0.88	4.8	25	155	4602-84-0	C15H26O	222.37		considered in next screening step
α-Farnesene	0.84	6.1	25	103	502-61-4	C15H24	204.35		value fits boundaries of pre-screening
Limonene	0.85	3.4	-95	46	138-86-3	C10H16	136.24
Ethyl palmitate	0.86	7.8	24	110	628-97-7	C18H36O2	284.5
Ethyl myristate	0.86	6.7	12.3	113	124-06-1	C16H32O2	256.42
Ethyl octanoate	0.87	3.5	-43	79	106-32-1	C10H20O2	172.26
Ethyl hexanoate	0.87	2.4	-67	49	123-66-0	C8H16O2	144.21
Ethyl Butyrate	0.88	1.3	-98	24	105-54-4	C6H12O2	116.16
Toluene	0.87	2.7	-94	4	108-88-3	C7H8	92.14
Ethyl benzene	0.87	3.1	-94	13	100-41-4	C8H10	106.16
1-phenylethanol	1.01	1.4	21	93	98-85-1	C8H10O	122.16
Butylbenzene	0.86	4.4	-87	71	104-51-8	C10H14	134.22
1,3 dioxolane	1.07	-0.4	-95	2	646-06-0	C3H6O2	74.08
2-Methyltetrahydrofuran	0.85	1	-136	-10	25265-68-3	C5H10O	86.13
Ethyl acetate	0.9	0.7	-83.6	7.2	141-78-6	C4H8O2	88.11
Hexyl acetate	0.87	2.4	-80.9	45	142-92-7	C8H16O2	144.21
Ethyl valerate	0.88	1.9	-91	39	539-82-2	C7H14O2	130.18
2-Octanone	0.82	2.4	-16	52	111-13-7	C8H16O	128.21
2-Nonanone	0.82	3.1	-15	64	821-55-6	C9H18O	142.24
2-Decanone	0.82	3.7	14	71	693-54-9	C10H20O	156.26
2-Undecanone	0.83	4.1	12	89	112-12-9	C11H22O	170.29
2-Dodecanone	0.83	4.6	21	110	6175-49-1	C12H24O	184.32
2-Tridecanone	0.82	5.2	30	107	593-08-8	C13H26O	198.34
2-Pentadecanon	0.82	6.3	39	113	2345-28-0	C15H30O	226.4
2-Heptadecanon	0.81	7.1	48	>110	2922-51-2	C17H34O	254.5
1-Heptadecanol	0.97	7.8	55	155	1454-85-9	C17H36O	256.5
Heptyl acetate	0.89	2.9	-50	68	112-06-1	C9H18O2	158.24
Octyl acetate	0.87	3.41	-38	86	112-14-1	C10H20O2	172.26
Dibutoxymethane	0.84	3.2	-58	43	2568-90-3	C9H20O2	160.25
Diethoxymethane	0.83	0.8	-66	-5	462-95-3	C5H12O2	104.15
4,5-octandiol	0.9	1.5	-	117	22607-10-9	C8H18O2	146.23
Dibutyl ether	0.77	3.2	-95	25	142-96-1	C8H18O	130.23
1-Decanol	0.83	4.6	7	108	112-30-1	C10H22O	158.28
Methyl decanoate	0.87	4.7	-18	110	110-42-9	C11H22O2	186.29
Methyl nonanoate	0.88	4.1	-35	86	1731-84-6	C10H20O2	172.26
Methyl linoleate	0.89	6.9	-35	97	112-63-0	C19H34O2	294.5
Dibutyl sebacate	0.96	5.3	-10	178	109-43-3	C18H34O4	314.5
Tributyl citrate	1.04	2.7	-20	184	77-94-1	C18H32O7	360.4
Dibutyl phthalate	1.04	4.7	-35	157	84-74-2	C16H22O4	278.34
2-Butyl-1-octanol	0.83	4.8	-80	110	3913-02-8	C12H26O	186.33
2-Methyltetrahydrofuran	0.86	1	-136	-11	96-47-9	C5H10O	86.13
Oleylamine	0.81	7.6	21	154	112-90-3	C18H37N	267.5
1,4-Butanediol	1.02	-0.8	21	121	110-63-4	C4H10O2	90.12
Bis(2-ethylhexyl) phthalate	0.99	7.4	-55	215	117-81-7	C24H38O4	390.6
1,4-Diaminopentane	0.9	-0.5	9	57	591-77-5	C5H14N2	102.18
Methyl tert-butyl ether	0.74	0.9	-108	-33	1634-04-4	C5H12O	88.15
Undecanal	0.83	4.3	-2	105	112-44-7	C11H22O	170.29
Nonanal	0.83	3.3	-19	64	124-19-6	C9H18O	142.24
Octanal	0.82	2.7	12	56	124-13-0	C8H16O	128.21
Ethyl oleate	0.87	8	-32	113	111-62-6	C20H38O2	310.5
2-Ethylhexan-1-ol	0.83	3.1	-70	81	104-76-7	C8H18O	130.3
Tributyrin	1.03	2.4	-75	180	60-01-5	C15H26O6	302.36
Hexadecane	0.77	8.8	17.9	135	544-76-3	C16H34	226.44
n-octane	0.7	4.8	-56	13	111-65-9	C8H18	114.23
alpha pinene	0.86	2.8	-63	31	80-56-8	C10H16	136.23
3-Methoxy-3-methyl-1-butanol	0.93	0.4	-	71	56539-66-3	C6H14O2	118.17
Octyl acetate	0.87	3.4	-38	86	112-14-1	C10H20O2	172.26
m-Xylene	0.86	3.2	-47	25	108-38-3	C8H10	106.16
2-Ethylhexyl acetate	0.87	3.2	-80	82	103-09-3	C10H20O2	172.26
2,5-Dimethylfuran	0.9	2.2	-63	1	625-86-5	C6H8O	96.13
Ethyl laurate	0.86	5.6	-10	131	106-33-2	C14H28O2	228.37
Cyclohexane	0.77	3.41	7	-18	110-82-7	C6H12	84.16
Cyclohexanol	0.96	1.2	25	63	108-93-0	C6H12O	100.16
Mesitylene	0.86	3.3	-44.7	50	108-67-8	C9H12	120.19
Di-n-butylether	0.77	3.2	-95	25	142-96-1	C8H18O	130.23
Di-n-pentylether	0.78	3.7	-69	57	693-65-2	C10H22O	158.28
Di-n-propylether	0.74	2	-122	-18	111-43-3	C6H14O	102.17
1-Dodecanol	0.83	5.1	24	127	112-53-8	C12H26O	186.33
1-Octene	0.72	4.6	-102	10	111-66-0	C8H16	112.21
Nonane	0.72	5.7	-51	31	111-84-2	C9H20	128.25
Cyclooctane	0.83	4.5	15	28	292-64-8	C8H16	112.21
Octyl octanoate	0.86	6.5	-18	110	2306-88-9	C16H32O2	256.42
Isopropyl myristate	0.85	7.2	3	164	110-27-0	C17H34O2	270.5
Isopropyl palmitate	0.85	8.2	13.5	110	142-91-6	C19H38O2	298.5
Hexyl hexanoate	0.86	4.9	-55	110	6378-65-0	C12H24O2	200.32
Hexyl octanoate	0.86	5.3	-31	110	1117-55-1	C14H28O2	228.37
Methyl octanoate	0.88	3.6	-37	82	111-11-5	C9H18O2	158.24
4-methyl anisole	0.97	2.7	-32	59	104-93-8	C8H10O	122.16
3-octanone	0.82	2.3	-23	59	106-68-3	C8H16O	128.21
Octanal	0.82	2.8	-23	52	124-13-0	C8H16O	128.21
Nerolidol	0.89	4.6	25	96	7212-44-4	C15H26O	222.4
delta-Decalactone	0.96	2.5	-27	110	705-86-2	C10H18O2	170.25
1-Octanol	0.83	3	-16	81	111-87-5	C8H18O	130.32
Ethyl formate	0.92	0.5	-80.5	-20	109-94-4	C3H6O2	74.08
Ethyl propionate	0.89	1.2	-73.9	12	105-37-3	C5H10O2	102.13
Ethyl lactate	1.03	0.2	-26	46	97-64-3	C5H10O3	118.1
Ethyl glycolate	1.1	-0.2	13	62	623-50-7	C4H8O3	208.21
Ethyl 2,4-dioxovalerate	1.13	0.2	17	110	615-79-2	C7H10O4	158.15
Farnesene isomeric mixture	0.84	6.1	4	110	125037-13-0	C15H24	204.4
Ethyl decanoate	0.86	4.6	-20	102	110-38-3	C12H24O2	200.32
1-Hexanol	0.82	2	-44	60	111-27-3	C6H14O	102.17
1-Heptanol	0.82	2.7	-34	77	111-70-6	C7H16O	116.2
Pentane	0.63	3.41	-130	-40	109-66-0	C5H12	72.15
Hexane	0.66	3.9	-95	-22	110-54-3	C6H14	86.18
Propyl acetate	0.89	1.2	-93	14	109-60-4	C5H10O2	102.13
Butyl acetate	0.88	1.8	-77	22	123-86-4	C6H12O2	116.16
