# Supplementary material for: Methyl ketones: a comprehensive study of a novel biofuel
Source: Royal Society of Chemistry journal article supplement (doi:10.1039/d4se00035h), 2024-01-01
Supplement: d4se00035h2.xlsx [file d4se00035h2.xlsx]

## Sheet: weighted decision matrix
	solvent	score
	Octyl octanoate	4.8		criteria	weight	2-Undecanone		Ethyl laurate		1-Decanol		Isopropyl myristate		Octyl acetate		2-Butyl-1-octanol		Butylbenzene		Octyl octanoate		2-Decanon		Undecanal		Decane		Ethyl myristate		1-Octanol		Farnesene		Ethyl octanoate		Nonanal		Isopropyl palmitate		Methyl decanoate		Hexyl hexanoate		Hexadecane		Ethyl decanoate		Ethyl oleate
	Farnesene	4.7				rating	total	rating	total	rating	total	rating	total	rating	total	rating	total	rating	total	rating	total	rating	total	rating	total	rating	total	rating	total	rating	total	rating	total	rating	total	rating	total	rating	total	rating	total	rating	total	rating	total	rating	total	rating	total
	Methyl decanoate	4.7		Green solvent	0.3	5	1.5	2	0.6	4	1.2	5	1.5	5	1.5	5	1.5	1	0.3	5	1.5	2	0.6	4	1.2	3	0.9	2	0.6	4	1.2	5	1.5	5	1.5	4	1.2	5	1.5	5	1.5	5	1.5	5	1.5	5	1.5	2	0.6
	2-Undecanone	4.6		Interphase	0.2	5	1	1	0.2	1	0.2	1	0.2	1	0.2	3	0.6	5	1	5	1	5	1	1	0.2	3	0.6	5	1	1	0.2	5	1	3	0.6	1	0.2	3	0.6	5	1	3	0.6	5	1	5	1	5	1
	Hexadecane	4.6		Growth assay	0.4	5	2	4	1.6	5	2	5	2	5	2	5	2	5	2	5	2	5	2	3	1.2	4	1.6	4	1.6	2	0.8	5	2	5	2	3	1.2	5	2	5	2	5	2	5	2	5	2	4	1.6
	Ethyl decanoate	4.6		Partition coefficient	0.1	1	0.1	5	0.5	5	0.5	4	0.4	4	0.4	3	0.3	3	0.3	3	0.3	3	0.3	3	0.3	2	0.2	2	0.2	2	0.2	2	0.2	2	0.2	2	0.2	2	0.2	2	0.2	1	0.1	1	0.1	1	0.1	1	0.1
	2-Butyl-1-octanol	4.4		Sum		4.6		2.9		3.9		4.1		4.1		4.4		3.6		4.8		3.9		2.9		3.3		3.4		2.4		4.7		4.3		2.8		4.3		4.7		4.2		4.6		4.6		3.3
	Ethyl octanoate	4.3
	Isopropyl palmitate	4.3		best score
	Hexyl hexanoate	4.2		lowest score
	Isopropyl myristate	4.1
	Octyl acetate	4.1
	2-Decanon	3.9
	1-Decanol	3.9
	Butylbenzene	3.6
	Ethyl myristate	3.4
	Decane	3.3
	Ethyl oleate	3.3
	Ethyl laurate	2.9
	Undecanal	2.9
	Nonanal	2.8
	1-Octanol	2.4

## Sheet: points explanation
	Score	1	2	3	4	5
	Growth assay	no turbidity	-	medium turbidity and colour change	medium turbidity	turbidity like control
	Sum of health and safety score	>7	6	5	4	<4
	Partition coefficient	≤ 33	34 to 43	44 to 53	53 to 61	62 to 135
	Interphase formation	strong interphase	-	slight interphase	-	no interphase

## Sheet: growth assay
																						Points in growth assay	LogP [-]
																					Ethyl laurate	4	5.6
																					1-Decanol	5	4.6
																					Isopropyl myristate	5	7.2
																					Octyl acetate	5	3.4
																					2-Butyl-1-octanol	5	4.8
																					Butylbenzene	5	4.4
																					Octyl octanoate	5	6.5
																					2-Decanon	5	3.7
																					Undecanal	3	4.3
																					Decane	5	5
																					Ethyl myristate	5	6.7
																					1-Octanol	1	3
																					Farnesene	5	6.1
																					Ethyl octanoate	5	3.5
																					Nonanal	3	3.3
																					Isopropyl palmitate	5	8.2
																					Methyl decanoate	5	4.7
																					Hexyl hexanoate	5	4.9
																					Hexadecane	5	8.8
																					Ethyl decanoate	5	4.6
																					Ethyl oleate	4	8
																					2-Undecanone	5	4.1

## Sheet: health and safety
		safety	health		health + safety
	Ethyl laurate	1	5		6		low/favourable points
	1-Decanol	1	2		3		high/unfavorable points
	Isopropyl myristate	1	1		2
	Octyl acetate	1	1		2
	2-Butyl-1-octanol	1	1		2
	Butylbenzene	3	5		8
	Octyl octanoate	1	1		2
	2-Decanon	1	5		6
	Undecanal	1	2		3
	Decane	3	2		5
	Ethyl myristate	1	5		6					2
	1-Octanol	1	2		3
	Farnesene	1	1		2
	Ethyl octanoate	1	1		2
	Nonanal	2	2		4
	Isopropyl palmitate	1	1		2
	Methyl decanoate	1	1		2
	Hexyl hexanoate	1	1		2
	Hexadecane	1	2		3
	Ethyl decanoate	1	1		2
	Ethyl oleate	1	5		6
	2-Undecanone	1	1		2

## Sheet: interphase
																		Rating	Points for interphase			Points for interphase formation
																		X	1		Ethyl laurate	1
																			2		1-Decanol	1
																		~	3		Isopropyl myristate	1
																			4		Octyl acetate	1
																		✓	5		2-Butyl-1-octanol	3
																					Butylbenzene	5
																					Octyl octanoate	5
																					2-Decanon	5
																					Undecanal	1
																					Decane	3
																					Ethyl myristate	5
																					1-Octanol	1
																					Farnesene	5
																					Ethyl octanoate	3
																					Nonanal	1
																					Isopropyl palmitate	3
																					Methyl decanoate	5
																					Hexyl hexanoate	3
																					Hexadecane	5
																					Ethyl decanoate	5
																					Ethyl oleate	5
																					2-Undecanone	5
