# Supplementary material for: Methyl ketones: a comprehensive study of a novel biofuel
Source: Royal Society of Chemistry journal article supplement (doi:10.1039/d4se00035h), 2024-01-01
Supplement: d4se00035h3.pdf [file d4se00035h3.pdf]

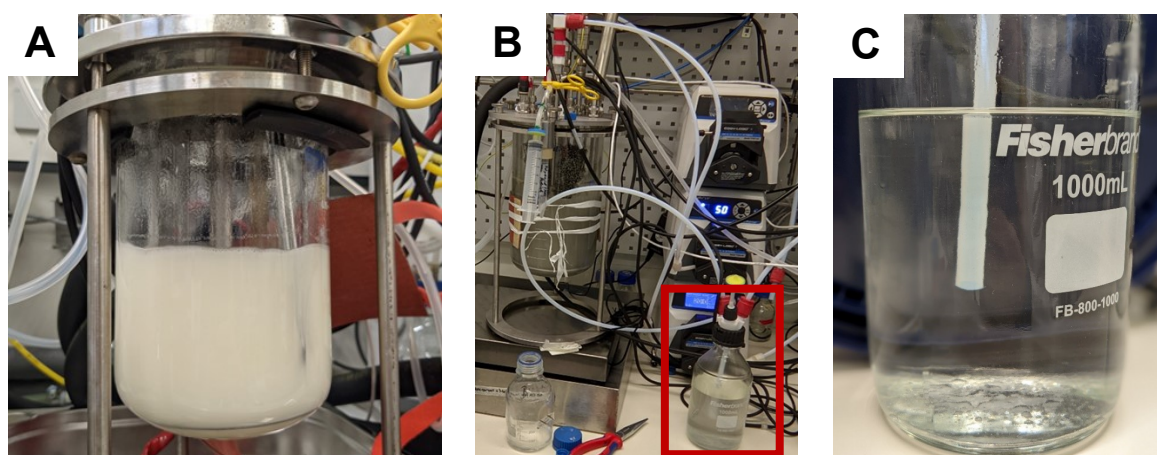

**Fig. A.1** Pictures of the cultivation broth of bioreactors with *P. taiwanensis* VLB120  $\Delta$ 6 pProd as a production host for methyl ketones with 2-undecanone as the organic solvent for *in situ* product extraction. A shows a cultivation in a stirred tank bioreactor (STR) with emulsion formation. B shows the cultivation in the novel multiphase loop reactor with countercurrent liquid liquid extraction in the outer compartment. From the solvent reservoir (red box picture B, picture C), the organic phase is pumped in a cycle. Notably, there is no emulsification

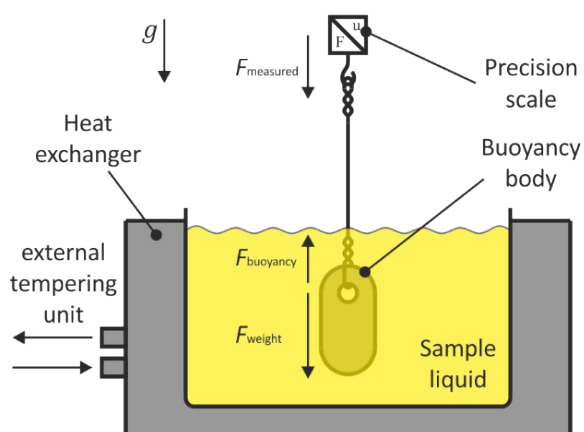

in B and C.

**Fig. A.2** Measurement setup for the determination of liquid density.<sup>1</sup>

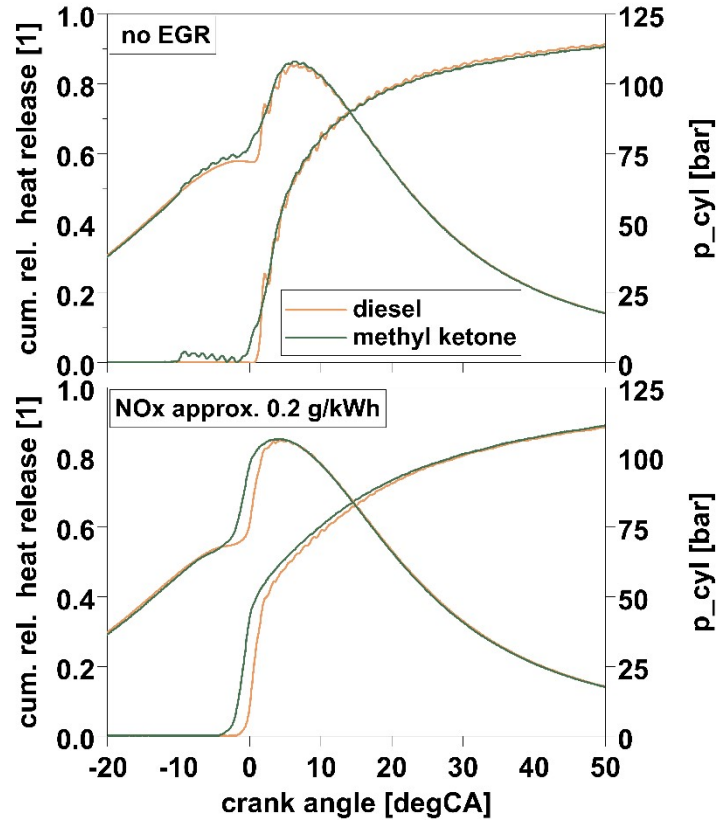

**Fig. A.3** Cylinder pressure and cumulative relative heat release over crank angle for the respective measurements in the displayed variation where exhaust gas recirculation (EGR) is off (top, refers to rightmost point in previous plot) and under very high EGR condition (closest to  $0.2 \text{ g/kWh}^{-1}$ ) for the methyl ketone blend and diesel.  $N = 1500 \text{ min}^{-1}$ ; IMEP = 6.8 bar;  $p_{\text{rail}} = 900 \text{ bar}$ ;  $\text{CA}_{50} = 5.8^\circ \text{C AaTDC}$ ;  $p_{\text{in}} = 1.5 \text{ bar}$ ;  $p_{\text{exh}} = 1.6 \text{ bar}$ .  $\eta$  = indicated efficiency; FSN = filter smoke number; SOI = start of injection; DOI = duration of injection; PRR = pressure rise rate; HC = unburned hydrocarbon;  $\lambda$  = relative air fuel ratio; EGR = exhaust gas recirculation; IMEP = indicated mean effective pressure;  $\text{CA}_{50}$  = center of combustion.

**Table A.1** Strains used in this study and for the defined inoculum of the fuel tank simulation. The method was adapted according to Ackermann *et al.* for methyl ketones.<sup>2</sup> DSMZ = Deutsche Sammlung von Mikroorganismen und Zellkulturen, German Collection of Microorganisms and Cell Cultures.

| Strain                           | Database number | Source                                      |
|----------------------------------|-----------------|---------------------------------------------|
| <i>Acinetobacter beijernikii</i> | DSM 22901       | DSMZ                                        |
| <i>Acinetobacter venetianus</i>  | DSM 23050       | DSMZ                                        |
| <i>Burkholderia cepacia</i>      | DSM 7288        | DSMZ                                        |
| <i>Micrococcus luteus</i>        | -               | Leuchtler <i>et al.</i> (2018) <sup>3</sup> |
| <i>Micrococcus yunnanensis</i>   | DSM 21948       | DSMZ                                        |
| <i>Pseudomonas fluorescens</i>   | -               | Leuchtler <i>et al.</i> (2018) <sup>3</sup> |
| <i>Pseudomonas poae</i>          | -               | Leuchtler <i>et al.</i> (2018) <sup>3</sup> |
| <i>Candida cylindracea</i>       | DSM 2031        | DSMZ                                        |
| <i>Debaryomyces hansenii</i>     | DSM 70244       | DSMZ                                        |
| <i>Debaryomyces polymorphus</i>  | DSM 70816       | DSMZ                                        |
| <i>Pichia membranifaciens</i>    | DSM 21959       | DSMZ                                        |
| <i>Raffaelea sp.</i>             | -               | Leuchtler <i>et al.</i> (2018) <sup>3</sup> |
| <i>Rhodotorula mucilaginosa</i>  | DSM 18184       | DSMZ                                        |
| <i>Ustilago maydis</i>           | -               | Leuchtler <i>et al.</i> (2018) <sup>3</sup> |
| <i>Yarrowia deformans</i>        | CBS 2071        | DSMZ                                        |
| <i>Yarrowia lipolytica</i>       | -               | Leuchtler <i>et al.</i> (2018) <sup>3</sup> |
| <i>Paecilomyces lilacinus</i>    | DSM 846         | DSMZ                                        |
| <i>Penicillium chrysogenum</i>   | DSM 21171       | DSMZ                                        |
| <i>Penicillium citrinum</i>      | -               | Leuchtler <i>et al.</i> (2018) <sup>3</sup> |
| <i>Micrococcus luteus</i>        | -               | Leuchtler <i>et al.</i> (2018) <sup>3</sup> |

## Ohnesorge Diagramm

Based on the fluid mechanical properties viscosity, density and surface tension, Ohnesorge, Reynolds, and Weber number were calculated for different nozzle diameters and injection pressures. The corresponding results are plotted on the Ohnesorge diagram as shown in Figure A.4. The Ohnesorge diagram indicates which form of spray can be expected for different Reynolds and Ohnesorge numbers. The range of atomization, which is desirable for spray processes in internal combustion engines, refers to Weber numbers higher than 40.3. A comparable atomization process can be assumed for the same Weber numbers [9, 10]. As can be seen, the Ohnesorge numbers of the methyl ketone mixture are slightly larger than those of the diesel fuel investigated. The Weber numbers of both fuels, on the other hand, are very identical, which also indicates a similar spray behavior. Especially when examining the other bio-hybrid fuels, it is noticeable that their Weber and Ohnesorge numbers differ significantly more from each other.

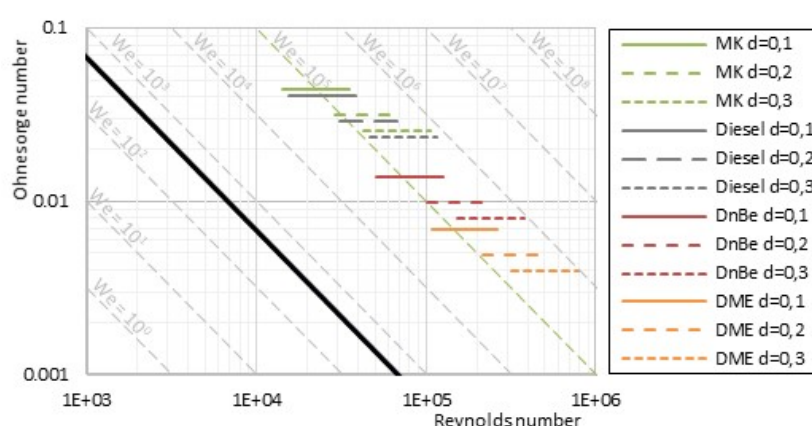

**Fig. A.4** Ohnesorge diagram for the methyl ketone blend, diesel, and different bio-hybrid fuels. MK = methyl ketones; DnBe = di-n-butylether; DME = dimethyl ether.

## References

1. M. Hofmeister, A. Frische, M. Grunewald, M. A. Reddemann, C. Grütering, L. M. Blank, R. Kneer and K. Schmitz, presented in part at the 21. International Sealing Conference, Stuttgart, Germany, October 12-13, 2022.
2. P. Ackermann, K. E. Braun, P. Burkardt, S. Heger, A. König, P. Morsch, B. Lehrheuer, M. Surger, S. Volker, L. M. Blank, M. Du, K. A. Heufer, M. Ross-Nickoll, J. Viell, N. von der Assen, A. Mitsos, S. Pischinger and M. Dahmen, *ChemSusChem*, 2021, **14**, 5254-5264.
3. B. Leuchtle, L. Epping, W. Xie, S. J. Eiden, W. Koch, D. Diarra, K. Lucka, M. Zimmermann and L. M. Blank, *International Biodeterioration & Biodegradation*, 2018, **132**, 84-93.
